# Supplementary material for: STAT2 hinders STING intracellular trafficking and reshapes its activation in response to DNA damage
Source: PubMed Central journal article supplement (PMC10120020; doi:10.1073/pnas.2216953120), 2023-04-10
Supplement: pnas.2216953120.sapp.pdf [file pnas.2216953120.sapp.pdf]

## Supporting Information for

## STAT2 hinders STING intracellular trafficking and reshapes its activation in response to DNA damage

Chenyao Wang<sup>1,5</sup>, Jing Nan<sup>2</sup>, Elise Holvey-Bates<sup>3</sup>, Xing Chen<sup>1</sup>, Samantha Wightman<sup>3</sup>, Muhammad-Bilal Latif<sup>4</sup>, Junjie Zhao<sup>1</sup>, Xiaoxia Li<sup>1</sup>, Ganes C. Sen<sup>1,\*</sup>, George R. Stark<sup>3,\*</sup>, Yuxin Wang<sup>3,\*</sup>

<sup>1</sup> Department of Inflammation and Immunity, Lerner Research Institute, The Cleveland Clinic Foundation, Cleveland, OH 44195, USA

<sup>2</sup> Institute of Cancer Biology and Drug Screening, School of Life Sciences, Lanzhou University, Lanzhou, Gansu 730000, China

<sup>3</sup> Department of Cancer Biology, Lerner Research Institute, The Cleveland Clinic Foundation, Cleveland, OH 44195, USA

<sup>4</sup> Pathology Advanced Translational Research Unit, Department of Pathology and Laboratory Medicine, School of Medicine, Emory University, Atlanta, 30322, GA, USA.

<sup>5</sup> Department of Medicine, Mayo Clinic College of Medicine and Science, Mayo Clinic, Rochester, MN 55905, USA.

**Email:** Yuxin Wang ([wangy7@ccf.org](mailto:wangy7@ccf.org)), George Stark ([starkg@ccf.org](mailto:starkg@ccf.org)), or Ganes Sen ([seng@ccf.org](mailto:seng@ccf.org))

### This PDF file includes:

Figures S1 to S8  
Table S1

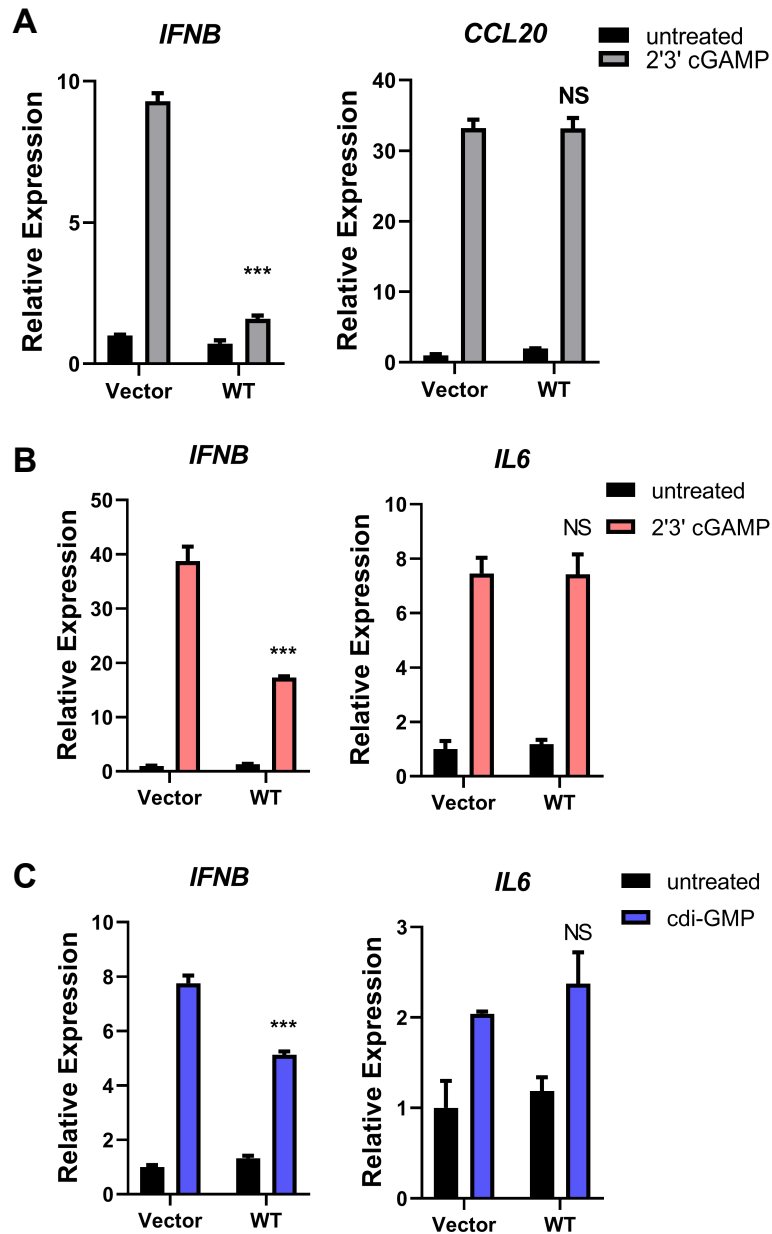

**Fig. S1. High expression of STAT2 inhibits induction of IFNB in response to various STING agonists.**

- Calu cells over expressing vector (EV) or STAT2 (WT) were stimulated with 2'3'cGAMP (8  $\mu\text{g/ml}$ ) or cdi-GMP (10  $\mu\text{g/ml}$ ) (C) for 4 h, followed by RT-PCR analysis. NS: Not Significant, \*\*\*  $P < 0.001$  by two-way ANOVA.
- THP1 cells over expressing vector (EV) or STAT2 (WT) were stimulated with 2'3'cGAMP (8  $\mu\text{g/ml}$ ) or cdi-GMP (10  $\mu\text{g/ml}$ ) (C) for 4 h, followed by RT-PCR analysis. NS: Not Significant, \*\*\*  $P < 0.001$  by two-way ANOVA.
- THP1 cells over expressing vector (EV) or STAT2 (WT) were stimulated with cdi-GMP (10  $\mu\text{g/ml}$ ) or cdi-GMP (10  $\mu\text{g/ml}$ ) (C) for 4 h, followed by RT-PCR analysis. NS: Not Significant, \*\*\*  $P < 0.001$  by two-way ANOVA.

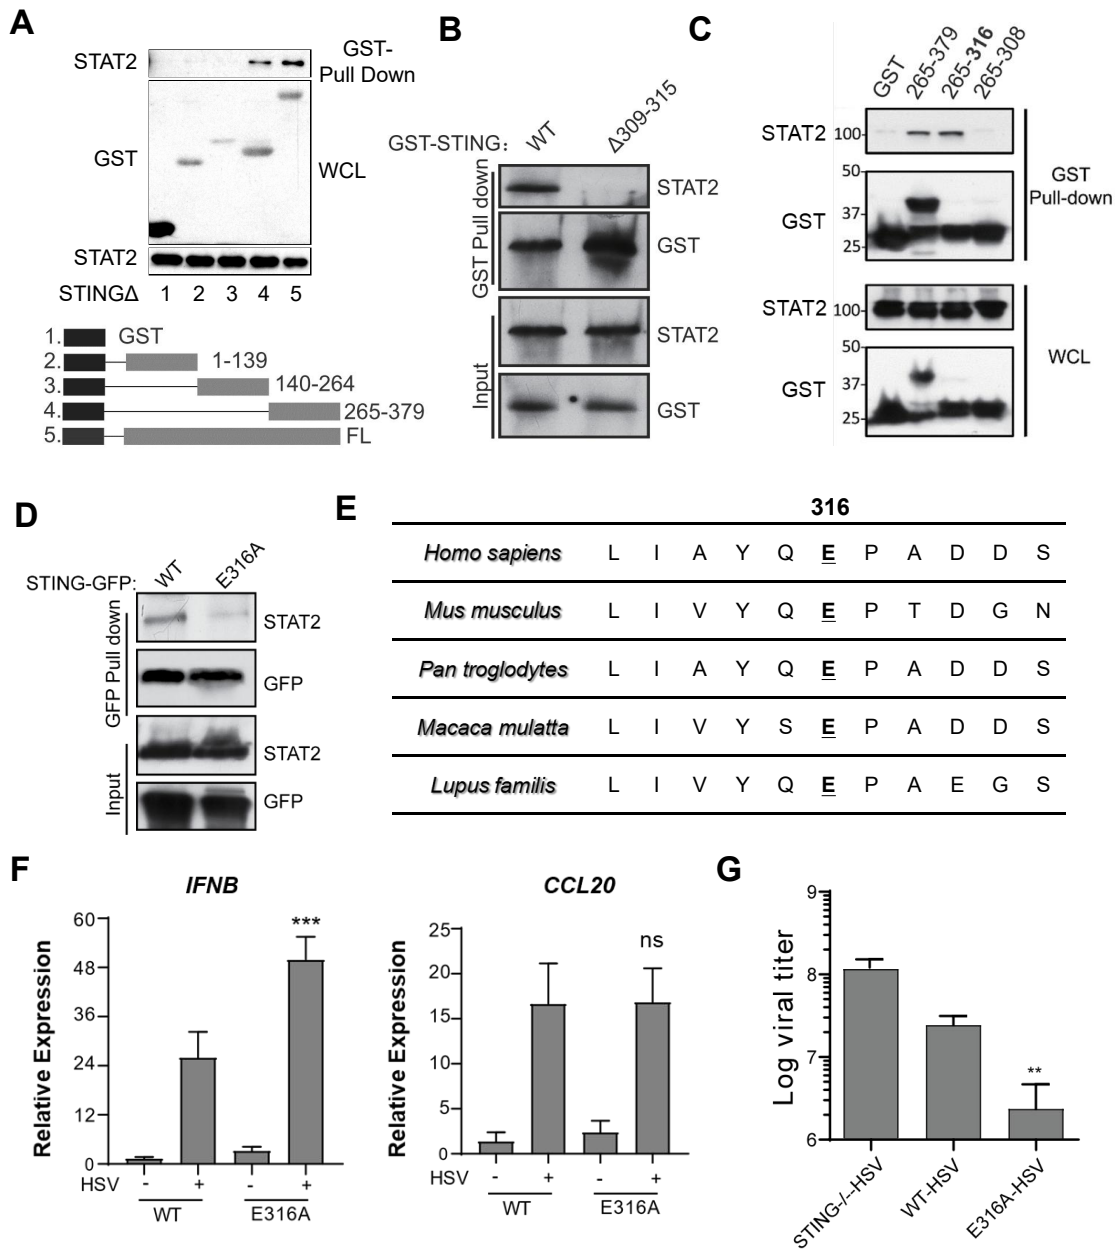

**Fig. S2. Interaction with STING is essential for inhibition by STAT2**

- GST-pull-down assay, using HEK293T cells transfected with GST-tagged truncations of STING.
- GST-pull-down assay, using HEK293T cells transfected with the indicated GST-tagged deletion of STING.
- GST-pull-down assay, using HEK293T cells transfected with GST-tagged specific deletions of STING.
- GST-pull-down assay, using HEK293T cells transfected with GST-tagged WT and E316A mutant of STING.
- STING E316 and surrounding sequences across species.
- STING-deficient HT1080 cells restored with WT- or E316A-STING were infected with HSV-1 (MOI=5) for 1 h, the media were refreshed for 4 h, followed by RT-PCR analysis.

- G. STING-deficient HT1080 cells restored with WT- or E316A-STING were infected with HSV-1 (MOI=5) for 1h, then the media were refreshed for 16h. The media were analyzed for HSV by plaque assay.

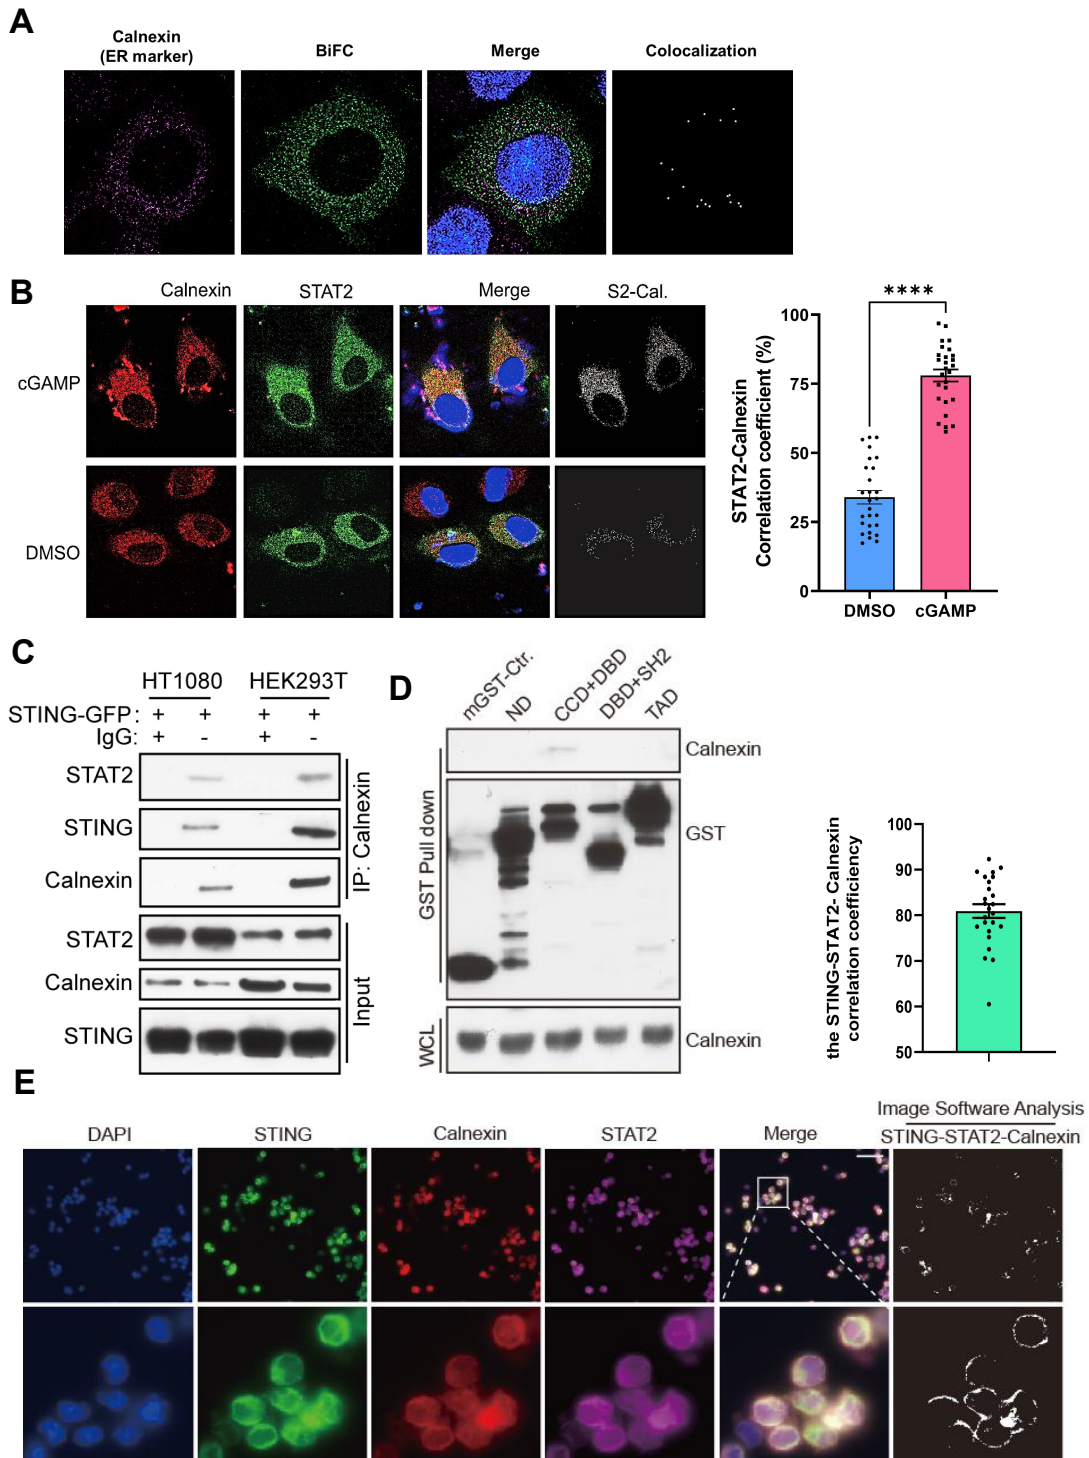

**Fig. S3.**

- A. Calu-1 cells transfected transiently STAT2-STING-V155M BiFC were monitored by confocal fluorescence microscopy.
- B. Calu-1 cells were transfected with STAT2-GFP (green) for 24 h, treated with cGAMP for 1 h. The cells were fixed and stained with calnexin antibody (red). Imaging data from confocal

- fluorescence microscopy were analyzed by Fuji software to reveal co-localization, shown as white dots.
- C. PBMC cells were cultured in RPMI-1640 medium and transfected with 8  $\mu\text{g/ml}$  cGAMP for 1 h. The cells were fixed and then stained with the indicated antibodies and DAPI. Imaging data from confocal fluorescence microscopy were analyzed by Fuji software to reveal co-localization as white dots.
  - D. IP analysis of STAT2-STING-calnexin interactions, in HT1080 and 293T cells transfected with STING-GFP for 48 h and treated with 8  $\mu\text{g/ml}$  cGAMP for 3 h.
  - E. GST-pull-down assay using HEK293T cells transfected with GST-tagged truncations of STAT2. ND: N-terminal Domain, CCD: Coil-coiled Domain, DBD: DNA-binding Domain, TAD: Trans-activation domain;

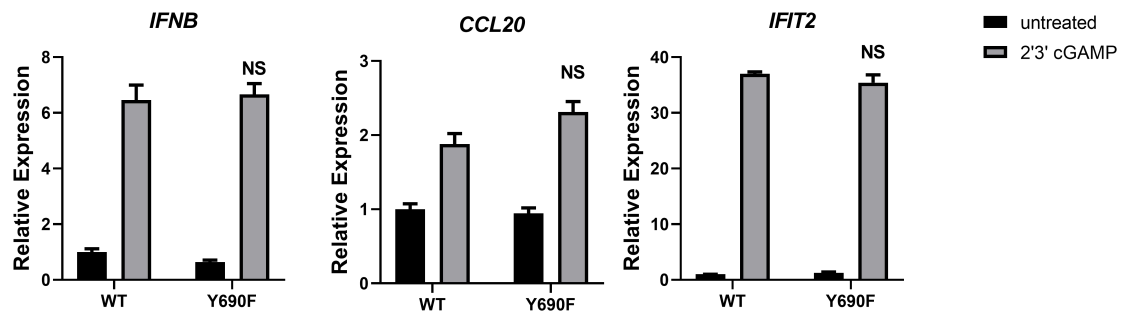

**Fig. S4. STAT2 inhibits STING activation independently of Y690 phosphorylation**

STAT2-deficient Calu-1 cells restored with WT STAT2 were stimulated with 2'3'cGAMP (8  $\mu$ g/ml) for 4 h, followed by RT-PCR analysis.

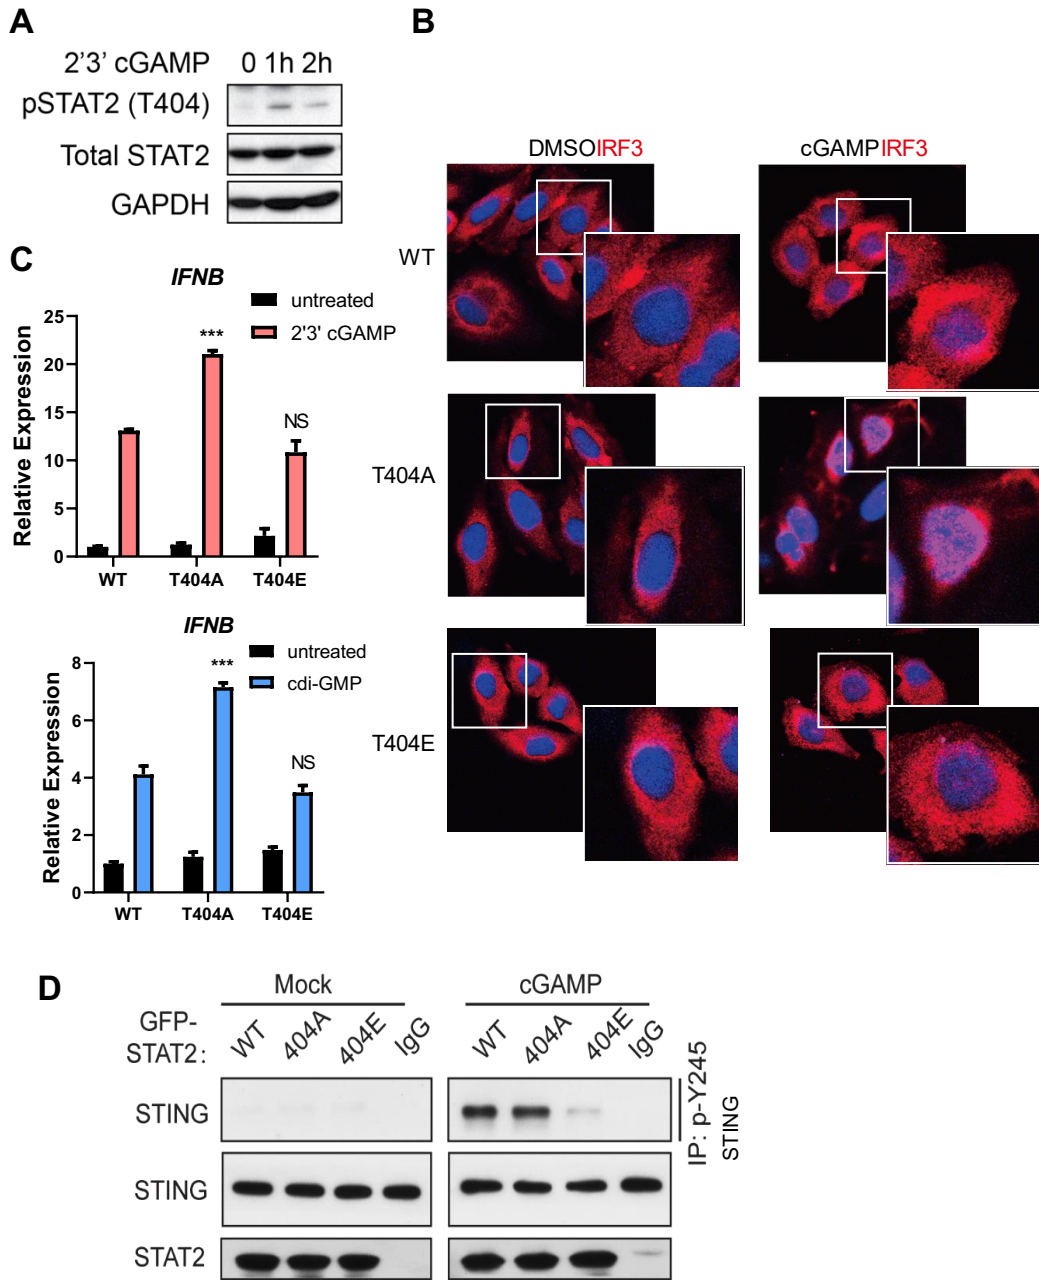



**E**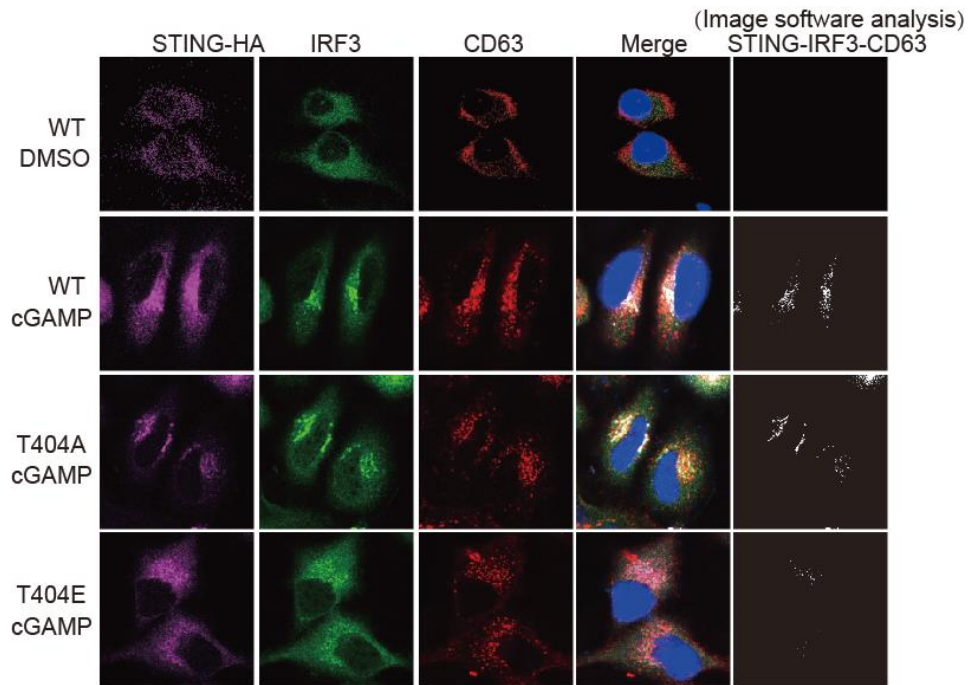**F**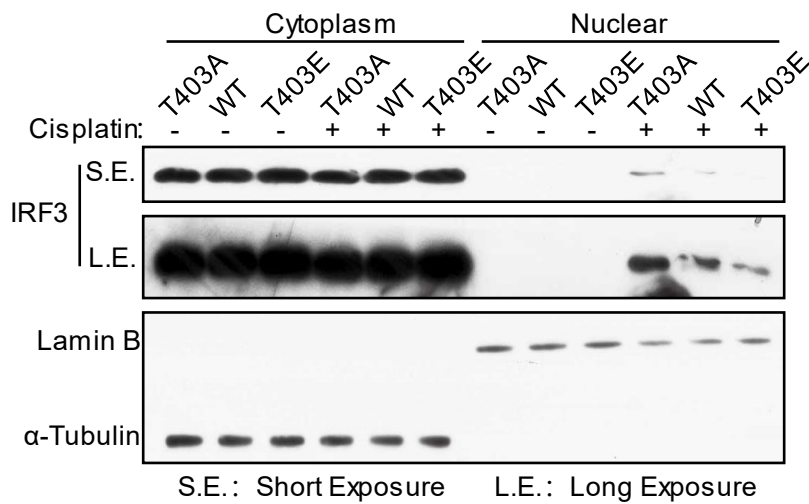**Fig. S5. STING mediates IRF3 activation on late endosomes.**

- Calu-1 cells were treated with cisplatin for 24 h, and whole-cell lysates were analyzed by the Western method.
- The cells from Figure 3D were fixed, then stained with anti-IRF3 (red) and DAPI for confocal analysis.
- THP-1 cells expressing WT, T404A, or T404E STAT2 were stimulated with 2'3'cGAMP (8  $\mu$ g/ml) or cdi-GMP (10  $\mu$ g/ml) for 4 h, followed by RT-PCR analysis.

- D. STAT2-deficient Calu-1 cells restored with WT, T404A, or T404E STAT2 were stimulated with 2'3'cGAMP (8  $\mu\text{g/ml}$ ) for 3 h, followed by Western analysis
- E. Primary STING<sup>-/-</sup> MEF cells were transfected with the indicated plasmids for 24 h and treated with cGAMP for 1 h. The cells were fixed, then stained with HA (purple), CD63 (red), and IRF3 (green) antibodies and DAPI. Imaging data from confocal fluorescence microscopy were analyzed with Fuji software to reveal co-localization as white dots. T403 is the residue corresponding to human T404 in mouse STAT2.
- F. Primary MEF cells were transfected with the indicated plasmids for 24 h and treated with cGAMP for 1 h, followed by nuclear fractionation and analyzed by the Western method.

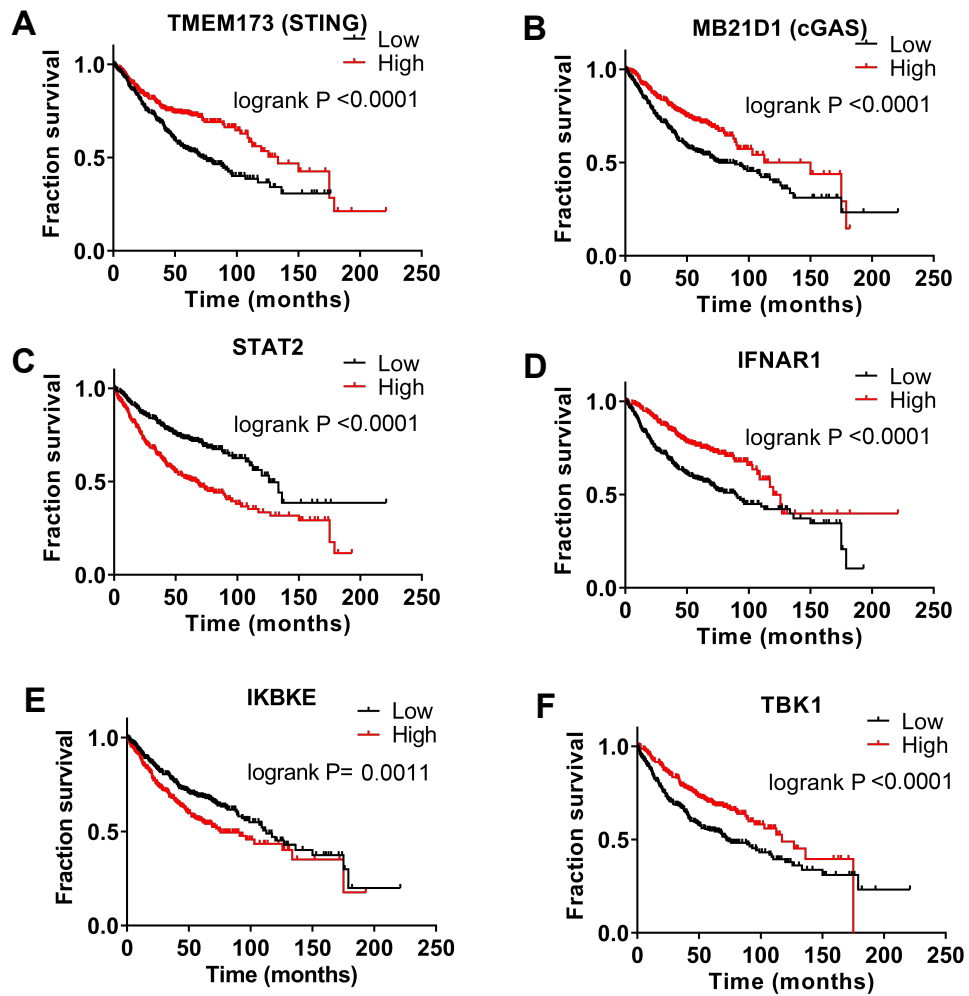

**Fig. S6. Expression of STING-related genes affects prognosis of lung adenocarcinoma patients**

Kaplan-Meier survival analysis of lung adenocarcinoma patients with respect to tumoral STING (A), cGAS (B), STAT2 (C), IFNAR1 (D), IKBKE (E), and TBK1 (F)

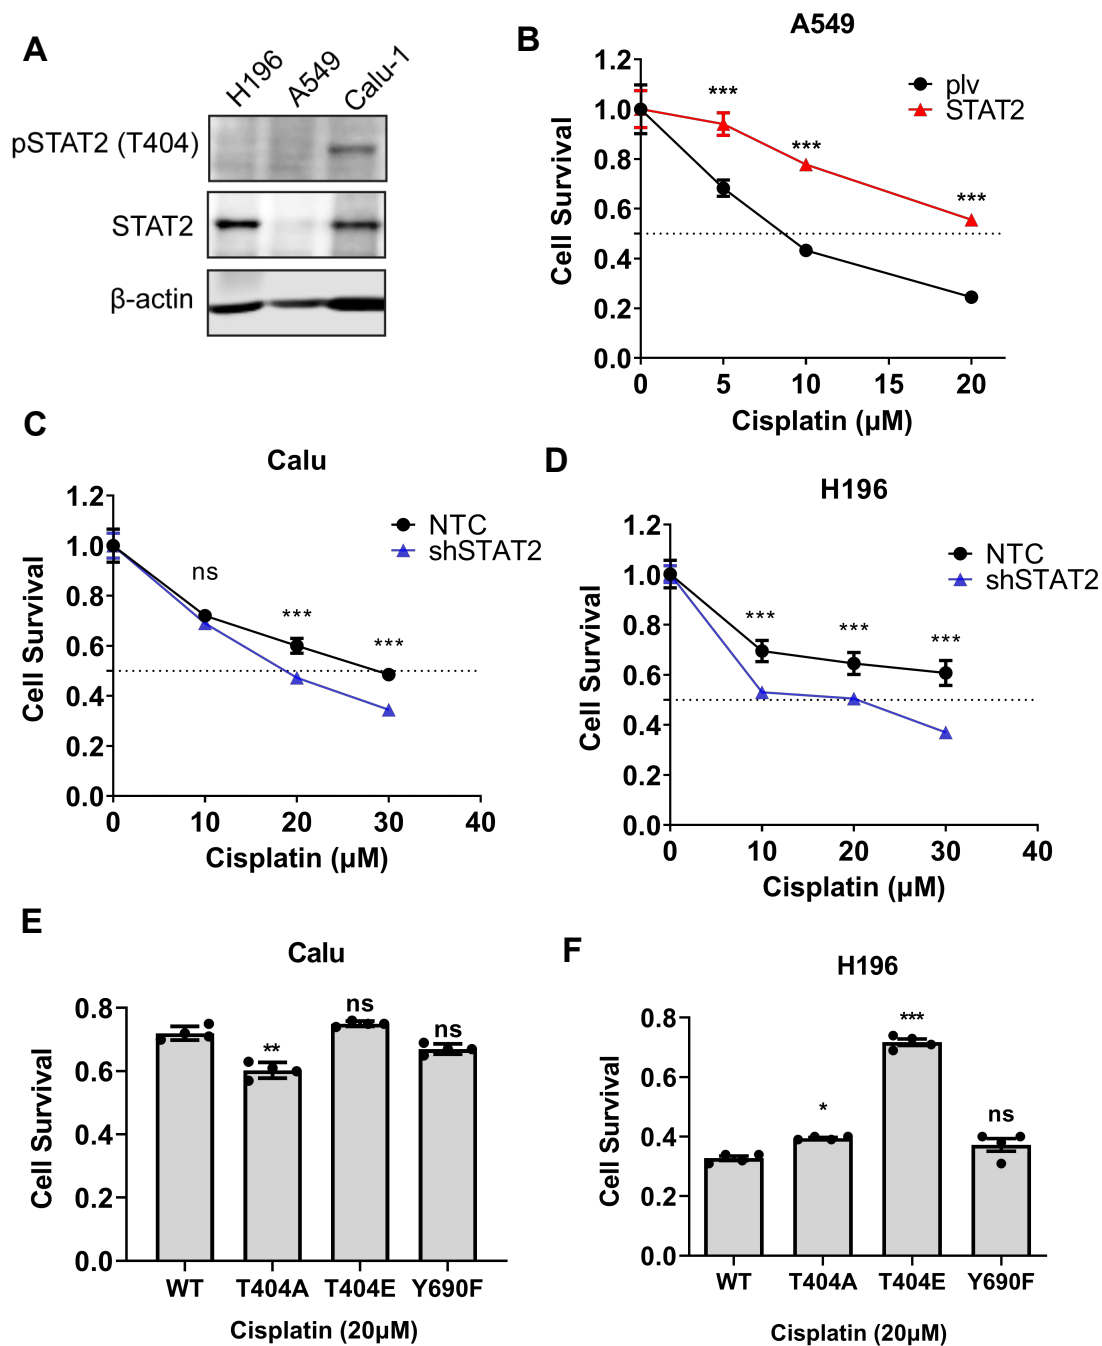

**Fig. S7. pT404 of STAT2 promotes cisplatin-resistance in lung cancer cell lines.**

- Whole cell lysates of H196, A549, Calu-1 cells were analyzed by the Western method.
- A549 cells expressing empty vector (pLV) or STAT2 cDNA were treated with cisplatin for 72 h and cell survival was determined by using the MTT assay.
- Calu-1 cells with or without STAT2 knockdown were treated with cisplatin for 72 h and cell survival was determined with the MTT assay.
- H196 cells with or without STAT2 knockdown were treated with cisplatin for 72 h and cell survival was determined with the MTT assay.

- E. STAT2-deficient Calu-1 cells restored with WT, T404A, T404E, or Y690F STAT2 were treated with cisplatin for 72 h and cell survival was determined with the MTT assay.
- F. STAT2-deficient H196 cells restored with WT, T404A, T404E, or Y690F STAT2 were treated with cisplatin for 72 h and cell survival was determined with the MTT assay.

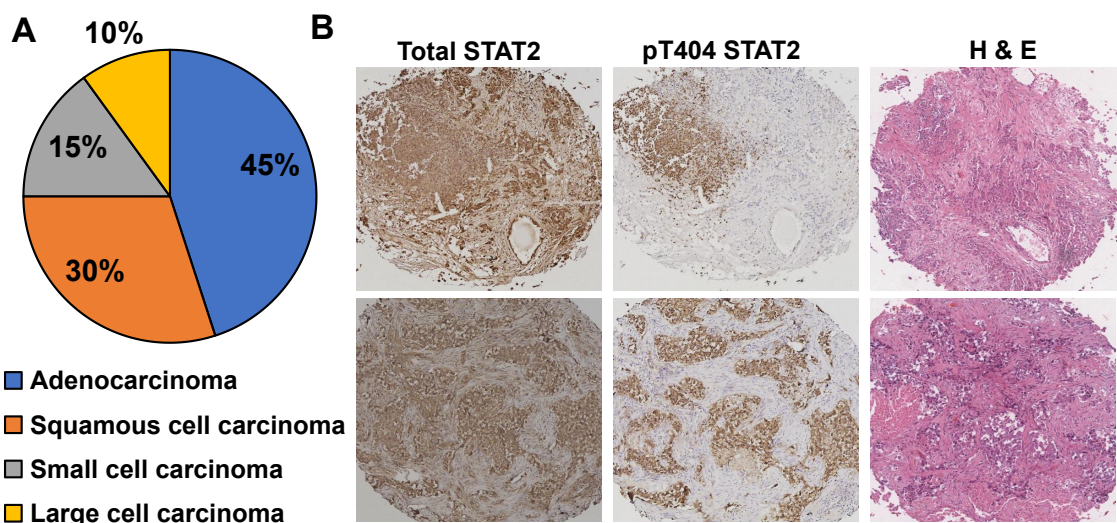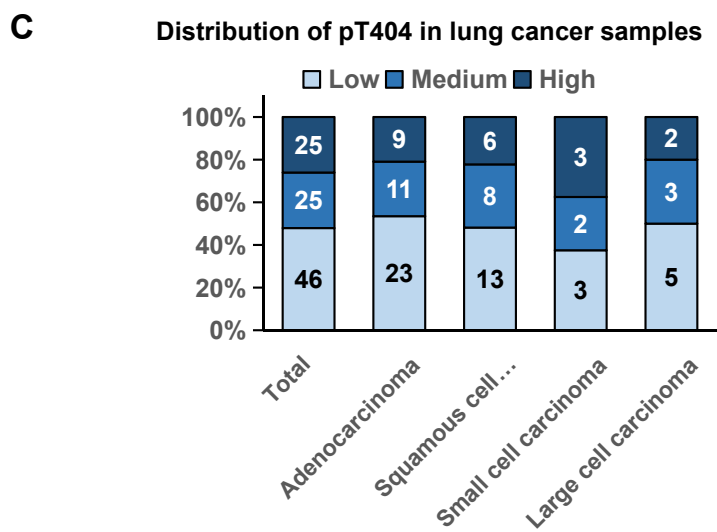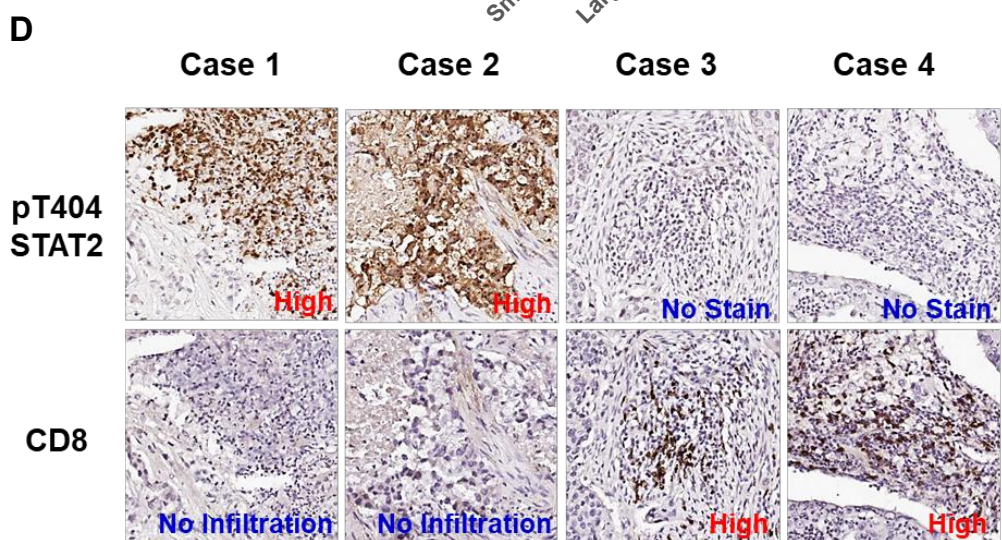

Fig.S8. T404 phosphorylation in lung cancer tissue arrays

- A. A human tissue array that includes various types of lung cancer is shown.
- B. Immunohistochemistry staining of human lung adenocarcinoma specimens. Representative staining of tumors high or low in phosphorylated T404 are shown.
- C. Immunohistochemistry staining of human lung adenocarcinoma specimens. Distributions of staining of tumors high or low in phosphorylated T404 are shown.
- D. Representative images of immunohistochemical staining for CD8 and phosphorylated T404 STAT2 in human lung adenocarcinoma specimens, showing an inverse correlation between P-T404 and CD8 infiltration.

| Reagent/Resource                                 | Reference or Source               | Identifier or Catalog Number |
|--------------------------------------------------|-----------------------------------|------------------------------|
| <b>Experimental Models</b>                       |                                   |                              |
| C57BL/6J ( <i>M. musculus</i> )                  | <a href="#">Wang et al, 2020</a>  | N/A                          |
| primary MEF STING <sup>-/-</sup> cells           | <a href="#">Ni et al, 2017</a>    | N/A                          |
| U6A cells                                        | <a href="#">Wang et al, 2020</a>  | N/A                          |
| HSV-1 (KOS)                                      | <a href="#">Blaho et al, 2005</a> | N/A                          |
| HT1080 STING <sup>-/-</sup>                      | This study                        | N/A                          |
| Human Mammary Epithelial Cells (HME)             | Lonza                             | CC-2551                      |
| A549 cells                                       | ATCC                              | Cat: CCL-185                 |
| HT1080 cells                                     | ATCC                              | Cat: CCL-121                 |
| HEK293T cells                                    | ATCC                              | Cat: CRL-11268               |
| HeLa cells                                       | ATCC                              | Cat: CRM-CCL-2               |
| BJ cells                                         | ATCC                              | Cat: CRL-4001                |
| H196                                             | ATCC                              | Cat: NCI-H196                |
| Calu cells                                       | ATCC                              | Cat: HTB-54                  |
| THP1 cells                                       | ATCC                              | Cat:TIB-202                  |
| Human Peripheral Blood Mononuclear Cells (hPBMC) | Lonza                             | CC-2704                      |
| L929 cells                                       | ATCC                              | Cat: CCL-1                   |
| DH5 alpha ( <i>E. coli</i> )                     | ThermoFisher                      | Cat: 18265017                |
| <b>Recombinant DNA</b>                           |                                   |                              |
| pLVX-human STAT2-GFP                             | This study                        | N/A                          |
| pLVX-human STAT2(T404A)-GFP                      | This study                        | N/A                          |
| pLVX-human STAT2(T404E)-GFP                      | This study                        | N/A                          |
| pLVX-human STING-GFP                             | This study                        | N/A                          |
| pGIPZ-human STAT2-UTR                            | This study                        | N/A                          |
| pLVX-mouse STAT2-myc                             | This study                        | N/A                          |
| pLVX-mouse STAT2(T403A)-myc                      | This study                        | N/A                          |
| pLVX-mouse STAT2(T403E)-myc                      | This study                        | N/A                          |
| mGST-STING(1-139)                                | This study                        | N/A                          |
| mGST-STING(140-264)                              | This study                        | N/A                          |
| mGST-STING(265-379)                              | This study                        | N/A                          |
| mGST-STING(Full length)                          | This study                        | N/A                          |
| Lenticrispr V2 hygro- SgSTING                    | This study                        | N/A                          |
| pLVX-STING-VC83                                  | This study                        | N/A                          |
| pLVX-STAT2-VN147                                 | This study                        | N/A                          |
| mGST-STAT2(ND)                                   | <a href="#">Wang et al, 2020</a>  | N/A                          |
| mGST-STAT2(CCD+DBD)                              | <a href="#">Wang et al, 2020</a>  | N/A                          |
| mGST-STAT2(DBD+SH2)                              | <a href="#">Wang et al, 2020</a>  | N/A                          |
| mGST-STAT2(TAD)                                  | <a href="#">Wang et al, 2020</a>  | N/A                          |
| mouse STING-HA                                   | This study                        | N/A                          |



|                                                     |                                  |                             |
|-----------------------------------------------------|----------------------------------|-----------------------------|
| human STING-HA                                      | This study                       | N/A                         |
| pLVX-STAT2-Flag                                     | <a href="#">Wang et al, 2020</a> | N/A                         |
| <b>Antibodies</b>                                   |                                  |                             |
| p-T404 STAT2 (Rabbit host)                          | <a href="#">Wang et al, 2020</a> | N/A                         |
| p-Y245 STING (Rabbit host)                          | Affinity Biosciences             | Cat:#CF2P                   |
| HSV1 ICP0 (Mouse host)                              | Abcam                            | Cat: ab6513                 |
| Calreticulin(Rabbit host)                           | Cell Signaling technology        | Cat:#12238                  |
| p-S366 hSTING (Rabbit host)                         | Cell Signaling technology        | Cat:#19781                  |
| STAT2(Rabbit host)                                  | Cell Signaling technology        | Cat: #72604                 |
| p-S396 IRF3 (Rabbit host)                           | Cell Signaling technology        | Cat:#29047                  |
| p-S172 IKKε (Rabbit host)                           | Cell Signaling technology        | Cat:#8766                   |
| p-Y690 STAT2 (Rabbit host)                          | Cell Signaling technology        | Cat:#88410                  |
| β-Tubulin (Rabbit host)                             | Cell Signaling technology        | Cat:#2146                   |
| GAPDH (Rabbit host)                                 | Cell Signaling technology        | Cat:#5174                   |
| Actin (Rabbit host)                                 | Cell Signaling technology        | Cat:#3700                   |
| IRF3 (Rabbit host)                                  | Abcam                            | Cat:ab68481                 |
| HA antibody(Mouse host)                             | Abcam                            | Cat:ab18181                 |
| STING antibody (Rabbit host)                        | Abclonal technology              | Cat:A3575                   |
| Calnexin Antibody(Rabbit host)                      | Gensript                         | Cat: A01240                 |
| CD63(Mouse host)                                    | MBL International Corporation    | Cat:D263-3                  |
| IRF3 (Alexa Fluor® 488)                             | Abcam                            | Cat:ab204647                |
| Human STING/TMEM173 Antibody                        | R&D system                       | AF6516                      |
| <b>Oligonucleotides and sequence-based reagents</b> |                                  |                             |
| h-18S rRNA-F,<br>CTACCACATCCAAGGAAGCA               | This study                       | Material and Method section |
| h-18S rRNA-R,<br>TTTTTCGTCACCTACCTCCCCG             | This study                       | Material and Method section |
| h-IFNβ-F,<br>CAACTTGCTTGGATTCTACAAAG                | This study                       | Material and Method section |
| h-IFNβ-R,<br>TATTCAGCCTCCCATTCAATTG                 | This study                       | Material and Method section |
| h-IFNα-F,<br>AATGACAGAATTCATGAAAGCGT                | This study                       | Material and Method section |
| h-IFNα-R, GGAGGTTGTCAGAGCAGA                        | This study                       | Material and Method section |
| h-Ccl20-F,<br>AAGTTGTCTGTGTGCGCAAATCC               | This study                       | Material and Method section |
| h-Ccl20-R,<br>CCATTCCAGAAAAGCCACAGTTTT              | This study                       | Material and Method section |
| h-lfit2-F,<br>TGCACCTGCAACCATGAGTGAGAACA            | This study                       | Material and Method section |
| h-lfit2-R,<br>GCCAGTAGGTTGCACATTGTGGC               | This study                       | Material and Method section |
| h-GAPDH-F,<br>TCCCTGAGCTGAACGGGAAG                  | This study                       | Material and Method section |
| h-GAPDH-R,<br>GGAGGAGTGGGTGTCGCTGT                  | This study                       | Material and Method section |
| h-IL6-F,<br>AGACAGCCACTCACCTCTTCAG                  | This study                       | Material and Method section |

|                                                                                                                                                                                      |                                                                 |                             |
|--------------------------------------------------------------------------------------------------------------------------------------------------------------------------------------|-----------------------------------------------------------------|-----------------------------|
| h-IL6-R,<br>TTCTGCCAGTGCCTCTTTGCTG                                                                                                                                                   | This study                                                      | Material and Method section |
| h-CXCL10-F,<br>GGTGAGAAGAGATGTCTGAATCC                                                                                                                                               | This study                                                      | Material and Method section |
| h-CXCL10-R,<br>GTCCATCCTTGAAGCACTGCA                                                                                                                                                 | This study                                                      | Material and Method section |
| HSV-ICP0-F ,<br>GTCGCCTTACGTGAACAAGAC                                                                                                                                                | This study                                                      | Material and Method section |
| HSV-ICP0-R ,<br>GTCGCCATGTTCCCGTCTG                                                                                                                                                  | This study                                                      | Material and Method section |
| Si-mSTAT2                                                                                                                                                                            | Santa Cruz Biotechnology                                        | sc-37272-PR                 |
| SgSTING sequence<br>:GCTGGGACTGCTGTAAACG                                                                                                                                             | This study                                                      | Material and Method section |
| <b>Chemicals, enzymes and other reagents</b>                                                                                                                                         |                                                                 |                             |
| 2'3'-cGAMP                                                                                                                                                                           | InvivoGen                                                       | Cat:tlrl-nacga23-02         |
| Cisplatin                                                                                                                                                                            | Selleckchem                                                     | Cat:NSC 119875              |
| Polyethyleneimine ( PEI)                                                                                                                                                             | Mpbio                                                           | Cat:195444                  |
| Lipofectamine 2000                                                                                                                                                                   | Invitrogen                                                      | Cat:11668019                |
| GFP trap                                                                                                                                                                             | Chromotek                                                       | Cat: gta-10                 |
| IFN-β                                                                                                                                                                                | PBL Interferon Source                                           | Cat:11415-1                 |
| <b>Software</b>                                                                                                                                                                      |                                                                 |                             |
| Image J                                                                                                                                                                              | <a href="https://imagej.net/Fiji">https://imagej.net/Fiji</a>   |                             |
|                                                                                                                                                                                      | Schindelin, J.; Arganda-Carreras, I. & Frise, E. et al. (2012), |                             |
| GraphPad Prism version 8.3 for Windows, GraphPad Software                                                                                                                            | www.graphpad.com                                                |                             |
| <b>Other</b>                                                                                                                                                                         |                                                                 |                             |
| <i>Kits, instrumentation, laboratory equipment, lab ware etc. that are critical for the experimental procedure and do not fit in any of the above categories can be listed here.</i> |                                                                 |                             |
| RNeasy Mini Kit                                                                                                                                                                      | Qiagen                                                          | Cat: 74104                  |
| Multiple lung cancer with lung tissue array                                                                                                                                          | Biomax                                                          | Cat: LC1201a                |

Table S1
